# Supplementary material for: Patient Satisfaction and its Influencing Factors: Results from a survey in inpatient department in a tertiary hospital setting in China
Source: Research Square preprint supplement (doi:10.21203/rs.3.rs-7055229/v1), 2025-07-17
Supplement: Supplementary file 1 [file 0dcd87999a9d6dffbeb42814.xlsx]

## Sheet: 数据
序号	@1.您的性别是	@2.您的年龄是	@3.您的学历是	@4.您家庭的月收入是	@5.您的职业是	@6.您本次住院的费用支付方式是	@7.您对医生的专业知识水平和技能是否满意	@8.您对医院的疼痛管理措施是否满意	@9.您对医院医疗设备先进齐全的程度是否满意	@10.您对医院的治疗方案是否满意	@11.您对医生解释病情和治疗方案的清晰度是否满	@12.您对医护人员在沟通中展示的同理心和关怀是	@13.您对医护人员在沟通过程中使用通俗易懂语言	@14.在您的治疗过程中，您觉得医护人员是否充分	@15.在沟通过程中，您认为医护人员会仔细、用心	@16.您对医护人员的服务态度是否满意	@17.您对医院内路标和指示的清晰程度是否满意	@18.您对医院食堂提供的饭菜是否满意	@19.您对医院内的卫生清洁情况是否满意	@20.您对医院晚上病房的安静舒适程度是否满意	@21.您对医院服务设施（如座椅、电梯、饮水设备	@22.您对入院、出院手续的办理效率是否满意	@23.您对医院提供医疗服务的流程是否满意	@24.您对取药排队的等候时间是否满意	@25.您对看病的排队秩序是否满意	@26.您对医院医疗费用的透明度是否满意	@27.您对医院药品费用的合理性是否满意	@28.您对住院期间检查费用（如CT、核磁共振）合理性是否满意	@29.您对医院提供费用清单的清晰程度是否满意	@30.总体上来说，您对医院是否满意	医患沟通	环境后勤	医疗流程	医疗费用	医疗技术
1	1	6	1	2	5	2	4	5	5	5	5	5	4	5	4	5	5	4	5	4	5	5	5	5	5	5	5	5	5	5	4.66667	4.6	5	5	4.75
2	2	6	1	5	5	2	5	5	5	5	4	5	5	5	5	5	5	4	5	5	4	5	5	5	5	5	5	4	5	5	4.83333	4.4	4.75	5	5
3	2	6	1	3	2	3	5	5	5	4	5	4	5	4	5	4	5	4	5	4	4	5	5	5	5	5	5	5	5	5	4.5	4.4	5	5	4.75
4	1	5	1	1	5	2	5	5	5	5	5	3	5	5	5	5	5	5	5	5	5	5	5	5	5	5	5	4	5	5	4.66667	5	4.75	5	5
5	2	6	1	1	5	2	5	5	5	4	4	5	4	5	5	4	4	5	4	5	4	5	5	5	5	5	5	5	4	5	4.5	4.6	4.75	5	4.75
6	2	6	1	5	5	2	5	5	5	5	5	5	5	5	4	5	5	5	5	5	5	5	5	5	5	4	5	4	5	5	4.83333	5	4.5	5	5
7	1	4	2	5	2	2	5	5	5	5	4	5	3	5	4	5	5	4	5	5	4	5	5	5	5	5	5	5	5	5	4.33333	4.4	5	5	5
8	1	4	2	3	5	2	5	5	5	5	5	4	5	4	5	4	5	4	5	4	4	5	5	5	5	5	5	4	5	5	4.5	4.4	4.75	5	5
9	1	6	2	3	6	2	4	4	5	5	5	5	5	5	5	5	5	4	5	5	5	5	5	5	5	5	5	5	5	5	5	4.8	5	5	4.5
10	1	6	1	1	5	1	5	5	4	4	4	5	4	5	5	4	4	5	4	5	5	5	5	5	5	5	5	5	5	5	4.5	4.8	5	4.75	4.5
11	2	6	1	1	5	2	5	5	5	5	5	5	3	5	4	5	5	5	5	5	5	5	4	5	5	5	5	4	5	5	4.5	5	4.75	4.75	5
12	1	6	1	1	5	2	4	5	5	4	4	5	4	5	4	4	5	4	5	5	4	5	4	4	4	5	5	5	5	5	4.33333	4.4	5	4.25	4.5
13	1	5	1	1	5	2	5	4	5	5	4	5	5	4	5	5	4	5	4	5	5	4	5	5	5	5	5	5	5	5	4.66667	4.8	5	4.75	4.75
14	1	5	2	3	4	2	4	5	5	4	5	5	3	4	3	4	3	3	3	3	3	3	3	3	2	3	3	4	3	3	4	3.2	3.25	2.75	4.5
15	2	6	1	2	5	2	3	4	3	4	3	3	3	2	4	3	2	1	2	2	2	2	1	2	1	1	2	2	2	2	3	1.8	1.75	1.5	3.5
16	2	6	1	2	5	2	5	5	5	5	5	5	5	5	5	5	5	5	5	5	5	5	5	5	5	5	5	5	5	5	5	5	5	5	5
17	2	6	2	1	6	2	2	4	3	3	1	2	2	2	2	1	4	4	4	3	3	2	5	5	3	3	5	4	5	5	1.66667	3.6	4.25	3.75	3
18	2	6	1	4	5	3	5	5	5	5	5	3	3	5	3	3	5	5	5	5	4	5	2	3	5	5	5	5	4	5	3.66667	4.8	4.75	3.75	5
19	1	4	1	4	5	1	4	2	2	4	2	1	2	2	2	1	2	1	2	2	1	2	2	1	2	1	2	2	2	2	1.66667	1.6	1.75	1.75	3
20	1	6	2	4	2	2	5	5	5	4	5	5	5	5	5	5	3	3	3	4	3	4	3	3	2	3	3	2	3	3	5	3	2.75	3	4.75
21	2	6	1	1	5	2	2	2	2	2	4	4	3	3	2	4	3	2	3	4	3	3	2	3	2	3	3	2	3	3	3.33333	2.8	2.75	2.5	2
22	1	5	1	3	5	1	5	5	5	5	5	4	3	5	5	5	5	5	5	5	5	5	5	5	5	5	5	4	5	5	4.5	5	4.75	5	5
23	1	6	1	2	5	2	5	5	5	5	5	5	5	5	5	4	5	5	5	5	5	5	5	4	5	5	5	5	5	5	4.83333	5	5	4.75	5
24	2	6	1	3	6	2	5	5	5	5	5	3	3	5	5	5	5	5	5	4	5	5	5	5	4	5	5	5	5	5	4.33333	4.6	5	4.75	5
25	2	5	1	3	5	2	5	5	5	5	5	3	5	5	4	5	5	5	5	4	5	5	4	5	5	3	4	5	4	5	4.5	4.8	4	4.75	5
26	2	3	2	5	4	2	3	3	2	3	3	3	3	4	3	3	1	3	1	2	3	3	3	3	2	3	3	4	3	3	3.16667	2.2	3.25	2.75	2.75
27	1	6	1	2	5	2	4	4	5	5	5	4	5	5	4	4	4	5	4	4	5	5	4	4	5	5	5	5	5	5	4.5	4.6	5	4.5	4.5
28	2	5	1	3	5	2	4	5	5	5	5	3	4	4	5	5	4	5	4	5	5	4	5	5	5	5	5	5	5	5	4.33333	4.8	5	4.75	4.75
29	2	2	3	2	1	2	5	5	5	5	5	4	5	5	4	5	5	5	5	5	4	5	4	5	5	5	5	4	5	5	4.66667	4.8	4.75	4.75	5
30	2	3	3	4	2	2	5	5	5	4	4	4	3	4	4	4	4	4	4	4	5	4	4	4	4	5	4	4	5	4	3.83333	4.2	4.5	4	4.75
31	1	4	2	3	6	2	5	5	5	5	5	5	4	5	4	5	5	5	5	4	5	5	4	5	5	5	5	4	5	5	4.66667	4.8	4.75	4.75	5
32	1	6	1	2	5	2	5	5	5	4	5	3	3	5	4	4	4	5	4	5	4	5	4	4	5	5	5	4	5	5	4	4.6	4.75	4.5	4.75
33	2	5	2	4	4	2	5	5	5	5	4	4	4	5	4	4	4	4	4	4	5	5	4	4	4	5	4	4	4	4	4.16667	4.2	4.25	4.25	5
34	1	4	1	1	5	2	5	5	5	5	5	5	4	5	4	5	5	4	5	4	4	5	4	5	5	5	5	5	5	5	4.66667	4.4	5	4.75	5
35	1	5	1	5	5	2	5	5	5	5	4	3	4	3	3	3	1	3	1	2	3	3	2	2	3	3	2	3	3	3	3.33333	2.4	2.75	2.5	5
36	1	5	2	3	4	3	4	4	5	5	5	5	3	5	4	5	5	5	5	4	5	5	4	5	5	5	5	5	5	5	4.5	4.8	5	4.75	4.5
37	1	6	2	4	3	2	5	4	5	5	5	4	5	4	5	5	5	5	5	4	4	4	5	5	5	4	5	5	5	5	4.66667	4.6	4.75	4.75	4.75
38	2	3	2	3	6	2	3	4	3	3	4	3	3	3	4	3	2	3	2	3	3	3	2	3	3	2	4	3	3	3	3.33333	2.8	3	2.75	3.25
39	1	4	1	1	5	2	3	3	4	3	2	3	3	3	3	3	3	3	3	3	3	3	3	3	4	2	3	3	3	3	2.83333	3.2	2.75	3.25	3.25
40	2	3	2	3	5	2	5	5	5	5	5	4	3	5	4	5	4	5	4	4	5	5	4	5	5	5	5	5	5	5	4.33333	4.6	5	4.75	5
41	2	4	2	2	4	2	4	5	4	4	4	5	4	5	5	5	4	5	4	5	5	5	5	5	5	4	5	5	5	5	4.66667	4.8	4.75	5	4.25
42	1	5	1	1	5	2	5	4	5	5	5	5	5	4	5	4	5	5	5	5	5	4	5	4	5	5	5	4	5	5	4.66667	5	4.75	4.5	4.75
43	1	6	1	1	5	2	4	5	5	5	5	5	5	5	5	5	3	5	3	4	5	5	5	5	5	5	5	5	5	5	5	4.4	5	5	4.75
44	2	2	3	3	2	2	5	4	5	5	5	4	4	5	4	5	5	5	5	4	5	5	4	5	5	5	5	4	5	5	4.5	4.8	4.75	4.75	4.75
45	2	4	1	1	5	2	5	5	5	5	5	2	2	5	5	5	5	5	5	4	5	5	5	5	5	5	5	5	5	5	4	4.8	5	5	5
46	2	5	1	1	6	2	4	4	5	5	4	5	5	5	4	5	2	4	2	5	5	5	4	5	4	3	5	5	5	5	4.66667	4	4.5	4.5	4.5
47	1	6	1	1	5	2	4	4	5	4	5	5	4	5	4	5	3	5	3	5	5	5	4	5	5	4	5	5	5	5	4.66667	4.6	4.75	4.75	4.25
48	2	6	1	1	5	2	5	4	4	5	5	5	4	4	5	5	3	5	3	5	5	4	5	5	5	5	5	5	5	5	4.66667	4.6	5	4.75	4.5
49	2	4	2	3	4	2	4	4	5	5	4	5	5	4	5	5	5	5	5	5	5	4	5	5	4	5	5	5	5	5	4.66667	4.8	5	4.5	4.5
50	1	2	3	5	1	1	3	3	3	3	3	3	3	4	3	3	3	3	3	2	3	4	3	2	3	5	3	3	3	3	3.16667	2.8	3.5	3	3
51	1	5	1	2	5	2	4	4	5	5	5	4	5	5	4	5	4	5	4	4	4	5	4	5	5	5	5	4	5	5	4.66667	4.4	4.75	4.75	4.5
52	1	5	1	1	5	2	4	5	5	5	4	3	2	4	4	4	4	4	4	3	3	4	4	4	4	5	5	5	5	4	3.5	3.6	5	4	4.75
53	1	4	3	5	4	2	5	5	5	5	5	5	4	5	5	4	5	5	5	5	5	5	5	4	4	5	5	4	5	5	4.66667	4.8	4.75	4.5	5
54	2	1	1	1	3	2	5	5	5	4	5	4	5	5	4	5	5	5	5	4	5	5	4	5	4	5	5	5	5	5	4.66667	4.6	5	4.5	4.75
55	1	6	1	1	5	2	5	5	5	5	5	2	5	5	4	4	5	5	5	4	4	5	4	4	5	5	5	4	5	5	4.16667	4.6	4.75	4.5	5
56	2	4	2	2	3	2	5	5	5	4	5	2	5	4	5	5	4	5	4	4	5	4	5	5	5	5	5	4	4	5	4.33333	4.6	4.5	4.75	4.75
57	2	5	1	2	3	2	5	5	5	5	3	4	4	4	4	4	4	4	3	5	4	4	4	4	4	5	5	4	5	4	3.83333	4	4.75	4	5
58	1	4	1	2	4	2	5	5	5	5	5	5	5	5	5	4	5	5	5	5	5	5	5	4	5	5	5	4	5	5	4.83333	5	4.75	4.75	5
59	1	6	1	1	5	2	5	5	5	5	4	3	4	3	4	4	4	4	3	4	3	3	4	4	4	4	4	4	4	4	3.66667	3.6	4	3.75	5
60	1	5	1	1	5	2	4	4	5	5	5	5	2	5	5	5	5	5	5	5	4	5	5	5	5	5	5	5	4	5	4.5	4.8	4.75	5	4.5
61	1	1	2	1	1	2	5	5	4	5	5	5	5	5	4	5	4	5	5	5	5	5	4	5	4	5	5	5	5	5	4.83333	4.8	5	4.5	4.75
62	1	5	1	1	5	2	5	4	5	5	5	5	4	5	5	5	5	5	5	5	5	5	5	5	5	5	5	5	5	5	4.83333	5	5	5	4.75
63	2	6	1	4	2	2	4	4	4	4	4	4	3	4	3	4	4	4	4	4	4	4	3	4	4	5	5	5	5	4	3.66667	4	5	3.75	4
64	1	6	1	2	5	3	4	4	5	5	5	4	5	5	4	5	4	5	5	5	4	5	4	5	4	5	5	5	5	5	4.66667	4.6	5	4.5	4.5
65	1	5	1	1	5	2	5	5	5	5	5	2	4	5	5	5	5	5	5	5	5	5	5	5	5	3	4	5	4	5	4.33333	5	4	5	5
66	2	6	1	1	5	2	5	5	5	5	5	5	5	4	5	5	5	4	5	4	5	4	5	5	5	4	5	5	5	5	4.83333	4.6	4.75	4.75	5
67	2	5	1	1	5	2	4	4	4	5	4	5	4	4	5	4	4	5	5	4	5	4	5	4	4	5	4	4	5	4	4.33333	4.6	4.5	4.25	4.25
68	2	6	1	1	5	2	5	5	5	5	5	2	5	5	5	5	4	4	5	5	5	5	5	5	4	5	5	5	5	5	4.5	4.6	5	4.75	5
69	2	6	4	5	2	3	4	4	5	5	5	5	4	5	5	3	5	4	4	4	5	5	5	3	5	5	5	5	5	5	4.5	4.4	5	4.5	4.5
70	1	4	1	1	5	2	5	4	5	4	5	2	5	4	5	4	4	5	4	4	4	4	3	4	4	5	4	4	5	4	4.16667	4.2	4.5	3.75	4.5
71	2	6	1	1	5	2	5	5	5	5	5	4	5	4	5	5	5	5	5	5	5	4	5	5	5	5	5	4	5	4	4.66667	5	4.75	4.75	5
72	2	6	1	1	5	2	4	4	5	5	5	4	4	4	4	4	5	5	4	5	5	4	4	4	3	5	5	5	5	4	4.16667	4.8	5	3.75	4.5
73	1	3	2	5	4	2	3	4	4	4	4	3	4	4	4	4	4	4	4	4	4	4	3	4	4	5	5	4	5	4	3.83333	4	4.75	3.75	3.75
74	2	5	1	2	4	2	4	4	5	5	5	5	4	5	5	5	4	4	5	5	4	5	5	5	4	5	5	4	5	4	4.83333	4.4	4.75	4.75	4.5
75	2	4	3	5	2	2	5	4	5	5	5	4	5	4	5	5	5	5	4	5	5	5	5	4	5	5	4	5	5	5	4.66667	4.8	4.75	4.75	4.75
76	2	5	1	2	5	2	4	4	5	5	5	5	5	5	4	5	5	5	4	5	5	5	4	5	5	5	5	4	5	4	4.83333	4.8	4.75	4.75	4.5
77	2	4	1	1	5	2	5	5	4	4	5	5	4	5	5	4	4	4	5	4	4	5	4	5	3	5	5	4	5	5	4.66667	4.2	4.75	4.25	4.5
78	2	4	1	2	5	2	4	5	5	5	3	4	4	4	4	4	4	4	3	4	3	3	4	4	4	4	4	4	3	4	3.83333	3.6	3.75	3.75	4.75
79	1	4	1	3	3	2	5	5	5	5	5	5	5	5	4	4	5	4	4	5	4	4	3	3	4	5	5	5	5	5	4.66667	4.4	5	3.5	5
80	2	4	1	1	5	2	5	5	5	4	4	5	4	4	4	4	4	4	3	4	3	5	4	4	4	5	5	5	5	4	4.16667	3.6	5	4.25	4.75
81	2	5	1	2	5	2	5	5	5	5	5	4	4	5	5	5	5	5	5	5	5	5	4	5	5	5	5	5	5	5	4.66667	5	5	4.75	5
82	2	5	1	1	6	2	5	5	5	4	5	3	3	3	3	3	3	3	4	4	3	3	3	3	2	3	2	3	3	3	3.33333	3.4	2.75	2.75	4.75
83	2	5	1	2	5	2	5	5	5	5	4	5	2	5	5	5	4	5	4	4	5	4	5	5	5	3	4	5	4	5	4.33333	4.4	4	4.75	5
84	1	5	1	4	4	2	5	5	5	5	5	5	5	4	5	5	5	5	5	5	5	5	5	5	5	4	4	5	5	5	4.83333	5	4.5	5	5
85	2	2	3	5	2	2	5	5	5	5	5	5	4	5	5	4	5	5	5	5	5	4	5	5	4	5	5	5	4	5	4.66667	5	4.75	4.5	5
86	2	6	1	1	5	2	4	4	5	5	5	4	2	4	5	5	5	4	4	5	4	5	5	5	5	5	4	5	5	5	4.16667	4.4	4.75	5	4.5
87	1	4	1	3	4	2	4	4	4	4	4	3	4	4	4	4	4	4	4	4	4	4	4	3	5	5	4	5	4	4	3.83333	4	4.5	4	4
88	2	4	3	4	2	2	5	4	4	4	4	4	2	5	5	5	5	5	5	5	5	5	5	4	5	5	5	5	5	5	4.16667	5	5	4.75	4.25
89	2	3	2	5	6	2	5	5	5	5	5	5	5	4	5	4	4	5	5	5	4	5	3	5	4	5	5	5	5	5	4.66667	4.6	5	4.25	5
90	2	2	3	4	4	2	5	5	5	5	4	5	5	5	5	5	5	5	4	5	5	5	5	5	5	5	4	5	4	5	4.83333	4.8	4.5	5	5
91	1	6	1	5	5	2	4	4	5	5	5	4	5	4	5	5	3	4	4	4	4	3	4	4	4	5	4	4	5	4	4.66667	3.8	4.5	3.75	4.5
92	1	6	3	5	6	3	3	3	2	2	3	4	3	3	3	3	3	2	4	4	3	3	3	2	3	5	5	4	4	3	3.16667	3.2	4.5	2.75	2.5
93	1	5	2	3	3	2	4	5	5	5	5	5	5	4	5	5	5	5	4	4	5	5	5	5	5	5	4	4	4	5	4.83333	4.6	4.25	5	4.75
94	2	2	1	3	6	1	4	4	5	5	5	2	4	5	5	5	5	5	4	4	4	5	5	4	5	5	4	4	5	5	4.33333	4.4	4.5	4.75	4.5
95	2	3	2	5	6	2	3	4	4	4	3	4	4	3	4	4	4	3	3	4	4	5	4	4	4	4	5	5	4	4	3.66667	3.6	4.5	4.25	3.75
96	2	4	3	3	2	2	4	5	5	4	5	2	5	5	5	5	5	4	5	4	5	4	5	5	5	5	5	4	5	5	4.5	4.6	4.75	4.75	4.5
97	2	3	3	5	2	2	4	4	5	5	5	5	4	5	5	5	5	4	5	5	5	5	5	5	5	5	5	5	5	5	4.83333	4.8	5	5	4.5
98	2	3	3	3	4	2	4	5	5	5	5	5	5	5	5	5	5	5	5	4	5	3	4	3	5	5	5	5	5	5	5	4.8	5	3.75	4.75
99	1	6	1	2	2	2	4	4	5	5	5	5	5	4	5	5	5	5	5	4	5	5	5	5	5	5	5	5	5	5	4.83333	4.8	5	5	4.5
100	2	3	4	5	2	2	2	2	1	1	1	2	1	2	2	2	1	1	3	2	1	1	1	1	1	5	5	5	5	1	1.66667	1.6	5	1	1.5
101	2	2	3	3	6	2	4	4	5	5	5	4	5	5	5	5	4	5	5	5	5	5	5	4	5	5	5	5	5	5	4.83333	4.8	5	4.75	4.5
102	1	5	1	2	5	2	4	5	5	5	4	5	5	5	5	5	4	5	5	5	5	4	5	5	5	5	5	5	5	5	4.83333	4.8	5	4.75	4.75
103	2	3	3	5	3	2	5	5	5	5	5	5	4	5	5	5	5	5	4	5	5	5	4	5	5	5	5	5	5	5	4.83333	4.8	5	4.75	5
104	2	3	2	3	3	2	5	5	5	4	5	5	5	5	4	5	5	4	5	5	5	5	4	5	3	3	4	5	4	5	4.83333	4.8	4	4.25	4.75
105	2	4	1	1	6	2	5	5	5	5	5	4	5	4	5	4	5	5	4	5	5	5	5	5	5	4	5	5	5	5	4.5	4.8	4.75	5	5
106	2	5	1	4	4	2	5	5	5	4	4	5	5	5	5	5	5	5	4	5	5	5	5	5	5	5	5	5	5	5	4.83333	4.8	5	5	4.75
107	1	5	1	2	5	2	5	5	5	5	5	4	5	5	4	5	5	5	4	4	4	5	5	5	5	5	5	5	5	5	4.66667	4.4	5	5	5
108	2	2	2	3	4	2	5	5	5	5	4	4	3	4	3	3	4	4	3	4	3	4	3	4	4	5	5	5	5	4	3.5	3.6	5	3.75	5
109	2	3	1	3	4	1	5	5	5	5	5	4	5	5	5	5	5	5	5	5	5	4	5	5	5	5	5	5	5	5	4.83333	5	5	4.75	5
110	2	3	3	5	4	2	4	4	5	5	3	4	4	4	4	4	4	4	3	3	4	4	3	4	3	5	5	4	4	4	3.83333	3.6	4.5	3.5	4.5
111	2	6	1	2	5	2	2	1	2	2	2	2	3	2	2	2	2	2	2	3	2	1	2	2	2	5	5	4	5	2	2.16667	2.2	4.75	1.75	1.75
112	1	6	3	5	2	3	5	4	5	5	4	2	5	5	4	5	5	5	4	5	5	5	5	5	2	5	5	5	5	5	4.16667	4.8	5	4.25	4.75
113	2	3	3	4	4	2	2	3	3	3	3	3	3	3	4	3	3	3	2	4	3	3	3	3	4	5	5	4	5	3	3.16667	3	4.75	3.25	2.75
114	1	6	2	5	5	2	5	5	5	5	5	2	5	5	5	5	5	5	4	5	5	5	5	5	5	5	5	4	5	5	4.5	4.8	4.75	5	5
115	2	6	1	1	5	2	5	3	5	4	5	4	4	5	4	4	4	4	2	4	4	3	4	4	4	5	5	5	4	4	4.33333	3.6	4.75	3.75	4.25
116	1	6	2	3	2	2	4	5	5	5	5	2	5	4	5	5	4	4	5	5	5	4	4	5	5	3	2	4	4	5	4.33333	4.6	3.25	4.5	4.75
117	2	6	1	4	5	2	4	3	3	3	3	3	4	3	3	3	3	3	4	3	3	4	3	3	4	3	3	3	4	3	3.16667	3.2	3.25	3.5	3.25
118	2	2	3	5	4	2	5	5	5	4	5	5	4	5	5	5	5	5	5	5	4	4	5	4	5	5	4	5	5	5	4.83333	4.8	4.75	4.5	4.75
119	1	6	1	2	5	2	5	4	4	5	5	5	5	5	4	5	2	5	3	5	4	5	5	4	5	5	5	5	4	5	4.83333	3.8	4.75	4.75	4.5
120	1	5	1	1	5	2	4	5	5	5	5	5	4	5	5	4	5	5	4	5	5	5	5	4	5	5	4	5	5	5	4.66667	4.8	4.75	4.75	4.75
121	2	5	2	3	3	3	3	4	4	4	5	5	5	5	5	5	4	3	4	4	4	4	4	3	4	5	5	5	5	4	5	3.8	5	3.75	3.75
122	2	3	1	5	6	2	4	3	5	4	4	3	2	4	5	4	4	4	4	4	3	5	4	4	3	3	4	4	5	4	3.66667	3.8	4	4	4
123	1	6	1	4	3	2	4	5	5	5	5	5	4	4	3	4	4	5	3	3	4	3	3	1	2	5	4	4	3	3	4.16667	3.8	4	2.25	4.75
124	2	4	1	3	3	2	5	5	5	5	3	2	3	2	4	3	3	3	2	2	2	2	1	1	2	2	3	2	4	2	2.83333	2.4	2.75	1.5	5
125	1	4	2	2	6	2	5	5	5	4	5	2	5	5	5	5	5	5	3	5	5	5	5	5	5	5	5	5	5	5	4.5	4.6	5	5	4.75
126	2	5	1	3	4	2	5	5	5	5	1	2	2	2	2	1	4	4	4	3	3	5	5	4	5	2	2	2	2	5	1.66667	3.6	2	4.75	5
127	1	5	1	2	3	2	5	5	5	4	5	3	3	5	3	3	5	5	3	5	4	5	3	5	5	3	3	5	3	5	3.66667	4.4	3.5	4.5	4.75
128	1	5	1	5	4	2	5	5	5	5	2	2	2	2	2	1	4	4	5	5	4	2	2	2	2	1	2	2	2	2	1.83333	4.4	1.75	2	5
129	1	6	1	1	5	2	5	5	5	5	5	5	5	5	5	5	5	3	3	3	3	3	3	2	3	5	5	5	5	3	5	3.4	5	2.75	5
130	2	6	1	4	4	2	5	5	5	5	4	4	4	3	2	4	2	2	4	3	4	2	3	3	3	4	4	3	2	3	3.5	3	3.25	2.75	5
131	2	5	1	4	6	2	4	4	5	5	4	4	5	5	5	5	4	5	5	4	5	5	3	5	5	4	5	5	5	5	4.66667	4.6	4.75	4.5	4.5
132	1	4	1	2	5	2	1	1	2	2	2	2	3	2	2	2	2	2	2	2	1	1	2	2	2	2	3	2	2	2	2.16667	1.8	2.25	1.75	1.5
133	2	3	3	3	2	1	4	3	3	3	3	3	3	3	4	3	3	3	2	3	4	4	3	4	4	3	3	3	4	3	3.16667	3	3.25	3.75	3.25
134	1	2	1	2	6	2	3	3	4	4	5	4	5	5	5	5	3	4	4	4	4	3	4	4	4	4	5	5	5	4	4.83333	3.8	4.75	3.75	3.5
135	1	4	1	4	6	2	5	5	5	5	5	4	5	5	5	5	4	5	5	3	5	4	5	5	5	4	5	5	5	5	4.83333	4.4	4.75	4.75	5
136	1	6	1	2	5	2	3	3	3	4	4	4	3	4	4	3	4	3	4	4	4	4	4	4	2	4	3	4	4	4	3.66667	3.8	3.75	3.5	3.25
137	2	5	1	3	6	2	3	3	4	3	3	3	2	3	3	3	3	3	3	3	2	2	3	3	3	3	2	3	3	3	2.83333	2.8	2.75	2.75	3.25
138	1	6	1	4	5	2	5	4	5	5	5	2	4	5	5	4	5	3	5	5	5	5	5	4	4	5	4	5	5	5	4.16667	4.6	4.75	4.5	4.75
139	2	4	2	4	5	2	2	1	1	2	2	3	2	2	2	2	2	3	3	1	2	2	2	2	2	3	2	2	2	2	2.16667	2.2	2.25	2	1.5
140	2	6	1	1	5	2	4	4	4	3	4	4	4	3	4	3	4	4	3	4	4	3	4	4	4	4	4	3	4	4	3.66667	3.8	3.75	3.75	3.75
141	2	4	1	3	4	2	4	5	5	5	4	5	5	4	5	5	5	5	5	5	5	5	5	5	4	5	5	4	5	5	4.66667	5	4.75	4.75	4.75
142	1	3	3	4	4	2	5	5	5	5	5	5	5	4	5	4	5	5	5	4	5	5	3	5	5	5	5	4	5	5	4.66667	4.8	4.75	4.5	5
143	1	6	2	5	6	2	5	5	5	4	4	2	4	3	4	4	4	4	4	4	5	4	4	4	5	4	4	3	4	4	3.5	4.2	3.75	4.25	4.75
144	1	6	2	3	4	2	5	5	5	5	2	2	2	2	2	3	2	3	2	3	2	2	2	1	3	2	2	2	2	2	2.16667	2.4	2	2	5
145	1	5	1	3	3	2	5	5	5	4	5	5	5	5	5	4	5	4	5	4	5	5	5	5	5	5	5	5	5	5	4.83333	4.6	5	5	4.75
146	1	6	1	4	5	2	5	5	5	5	4	5	5	5	5	4	4	3	4	5	5	5	5	4	4	5	5	5	5	5	4.66667	4.2	5	4.5	5
147	2	3	1	3	5	2	5	5	5	5	3	2	4	4	4	4	4	4	3	4	3	4	4	4	5	4	4	4	4	4	3.5	3.6	4	4.25	5
148	1	3	2	4	2	2	5	5	5	5	2	2	2	2	3	3	1	1	2	2	2	1	2	2	2	2	2	2	3	2	2.33333	1.6	2.25	1.75	5
149	2	4	1	3	6	2	4	4	5	5	4	3	3	4	4	3	4	3	3	4	3	5	4	5	5	3	3	4	4	4	3.5	3.4	3.5	4.75	4.5
150	2	4	2	3	4	2	4	3	3	3	3	3	3	3	4	3	3	3	3	3	4	4	3	4	4	3	3	3	4	3	3.16667	3.2	3.25	3.75	3.25
151	2	6	1	2	5	2	5	5	5	3	4	4	4	3	4	3	3	4	4	4	4	5	4	4	4	4	4	3	4	4	3.66667	3.8	3.75	4.25	4.5
152	1	5	1	2	5	3	4	3	4	4	4	4	4	3	4	4	4	4	3	3	4	2	2	4	3	4	4	3	4	4	3.83333	3.6	3.75	2.75	3.75
153	2	6	1	3	5	2	4	3	4	3	3	4	4	4	4	4	3	4	4	4	4	4	4	4	3	4	4	4	4	4	3.83333	3.8	4	3.75	3.5
154	1	5	1	2	5	2	4	4	3	5	5	4	4	5	5	5	5	5	5	5	5	5	5	5	4	4	4	5	5	5	4.66667	5	4.5	4.75	4
155	1	5	1	2	3	2	5	5	5	5	5	2	4	4	5	5	4	3	4	5	5	4	5	5	4	5	4	4	5	5	4.16667	4.2	4.5	4.5	5
156	2	5	1	4	5	2	4	3	4	3	5	5	4	5	5	5	5	5	5	5	5	3	5	5	5	5	4	5	5	5	4.83333	5	4.75	4.5	3.5
157	1	6	1	2	5	2	4	5	5	4	5	5	5	5	5	5	4	3	5	5	5	5	5	5	5	5	5	5	5	5	5	4.4	5	5	4.5
158	1	5	2	3	5	2	3	2	2	2	2	2	3	2	2	3	2	2	2	3	2	2	2	2	3	2	3	2	2	2	2.33333	2.2	2.25	2.25	2.25
159	1	6	1	3	6	2	5	5	5	4	5	5	5	5	2	5	4	5	4	5	5	4	2	4	4	5	5	5	4	5	4.5	4.6	4.75	3.5	4.75
160	1	5	1	2	4	2	4	4	4	4	4	4	4	3	3	4	4	4	3	4	4	3	2	4	3	4	4	3	3	4	3.66667	3.8	3.5	3	4
161	2	2	1	3	6	2	5	5	4	5	5	4	5	5	5	5	4	5	5	5	5	5	5	4	5	4	5	5	5	5	4.83333	4.8	4.75	4.75	4.75
162	1	6	1	2	5	2	4	3	3	3	3	3	3	3	4	3	3	3	3	3	3	4	3	4	4	3	3	3	4	3	3.16667	3	3.25	3.75	3.25
163	2	3	3	5	2	2	3	4	4	4	2	3	4	3	4	4	4	4	3	4	3	3	4	3	4	3	4	3	4	4	3.33333	3.6	3.5	3.5	3.75
164	2	2	3	3	4	2	2	4	3	2	4	4	3	4	4	4	3	4	3	4	4	4	4	4	3	4	3	4	4	4	3.83333	3.6	3.75	3.75	2.75
165	1	1	1	2	6	2	4	5	5	5	5	4	5	5	5	5	4	5	3	5	4	4	5	4	5	4	5	5	5	5	4.83333	4.2	4.75	4.5	4.75
166	1	6	1	2	5	2	5	5	5	5	5	5	5	4	5	5	5	4	3	4	3	4	4	4	4	5	5	4	5	5	4.83333	3.8	4.75	4	5
167	2	5	1	3	6	2	4	5	5	5	4	4	5	4	4	5	4	4	4	4	4	5	5	5	4	4	5	4	4	5	4.33333	4	4.25	4.75	4.75
168	2	2	3	4	6	2	4	5	5	4	4	5	4	5	5	4	5	5	5	5	5	5	5	4	4	5	4	5	5	5	4.5	5	4.75	4.5	4.5
169	1	2	3	4	2	2	4	5	5	5	5	5	4	5	4	5	5	5	5	5	5	5	5	4	5	5	4	5	4	5	4.66667	5	4.5	4.75	4.75
170	1	6	1	1	5	2	5	5	5	5	4	5	5	5	4	4	4	4	5	5	4	4	4	4	5	5	5	5	4	5	4.5	4.4	4.75	4.25	5
171	2	5	1	2	3	2	5	5	5	4	5	4	5	4	5	4	5	3	5	4	4	5	5	5	4	4	5	4	5	5	4.5	4.2	4.5	4.75	4.75
172	1	3	2	2	4	2	5	5	5	5	5	2	3	5	5	5	5	5	5	4	5	4	5	5	5	4	3	5	5	5	4.16667	4.8	4.25	4.75	5
173	1	3	2	3	6	1	5	5	5	4	5	5	5	5	4	5	5	5	3	5	4	5	5	5	5	5	5	5	4	5	4.83333	4.4	4.75	5	4.75
174	1	2	4	5	3	3	5	5	5	5	5	5	4	5	5	4	4	5	5	3	4	5	5	3	5	5	4	5	5	5	4.66667	4.2	4.75	4.5	5
175	1	5	2	1	5	2	5	5	5	5	4	2	3	4	4	3	4	3	4	4	3	4	3	4	4	4	3	4	4	4	3.33333	3.6	3.75	3.75	5
176	2	3	1	3	4	2	5	5	5	5	5	2	4	5	4	5	5	3	5	5	5	5	5	5	5	5	4	5	4	5	4.16667	4.6	4.5	5	5
177	1	4	1	1	5	2	4	4	5	5	4	5	5	5	5	5	5	5	5	5	5	4	4	5	5	5	5	5	5	5	4.83333	5	5	4.5	4.5
178	1	4	1	3	5	2	5	5	5	5	5	4	4	5	5	5	5	5	5	5	4	5	4	5	5	4	4	5	5	5	4.66667	4.8	4.5	4.75	5
179	2	2	3	3	2	2	4	4	4	4	5	4	5	5	4	5	4	4	5	5	4	5	5	5	5	4	5	5	4	5	4.66667	4.4	4.5	5	4
180	2	5	1	1	5	2	5	5	5	4	5	5	4	5	5	5	5	5	5	5	5	4	5	5	5	5	4	5	5	5	4.83333	5	4.75	4.75	4.75
181	2	6	1	2	5	2	5	4	4	4	4	1	4	4	4	3	4	4	4	4	3	3	4	4	3	4	4	4	4	4	3.33333	3.8	4	3.5	4.25
182	2	5	1	1	5	2	5	5	5	4	5	2	5	5	5	5	4	3	5	5	5	2	2	2	4	2	5	5	5	5	4.5	4.4	4.25	2.5	4.75
183	2	2	3	4	2	2	4	5	4	5	5	4	5	5	5	4	5	5	5	5	5	4	5	3	5	4	5	5	5	5	4.66667	5	4.75	4.25	4.5
184	1	2	3	4	1	2	5	5	4	5	5	1	5	5	5	4	2	4	3	4	2	5	5	3	4	5	5	5	5	5	4.16667	3	5	4.25	4.75
185	1	6	1	2	6	2	5	4	5	5	5	5	5	4	4	5	5	4	4	5	5	5	5	5	2	5	5	4	4	5	4.66667	4.6	4.5	4.25	4.75
186	1	6	1	1	6	2	5	5	5	4	5	5	5	5	4	4	5	3	4	3	4	5	5	3	2	5	5	5	4	5	4.66667	3.8	4.75	3.75	4.75
187	2	2	3	3	4	2	5	5	4	4	4	4	1	1	4	3	5	5	4	4	4	4	5	4	4	4	4	4	4	4	2.83333	4.4	4	4.25	4.5
188	1	5	1	2	5	2	5	5	5	4	5	5	5	5	4	4	4	3	2	4	3	5	5	4	5	5	5	5	4	5	4.66667	3.2	4.75	4.75	4.75
189	1	2	2	3	6	2	5	4	4	4	4	4	4	4	3	4	3	2	4	4	4	4	4	5	4	4	4	4	3	4	3.83333	3.4	3.75	4.25	4.25
190	2	3	3	1	6	2	5	5	5	5	5	4	5	1	4	5	4	5	5	5	5	5	5	5	5	4	5	5	4	5	4	4.8	4.5	5	5
191	2	2	2	5	6	2	5	5	5	5	5	5	5	5	4	5	5	5	4	5	5	4	4	3	4	5	5	5	4	5	4.83333	4.8	4.75	3.75	5
192	2	3	2	3	6	2	5	5	5	4	5	4	5	4	5	5	4	4	5	5	5	4	3	3	4	4	5	4	5	5	4.66667	4.6	4.5	3.5	4.75
193	1	6	1	1	5	1	5	5	5	5	5	5	4	5	5	5	5	5	5	5	5	5	5	5	5	5	4	5	5	5	4.83333	5	4.75	5	5
194	1	3	3	5	2	1	5	5	5	5	4	4	5	5	5	5	5	5	4	5	5	4	3	3	4	4	5	5	5	5	4.66667	4.8	4.75	3.5	5
195	2	2	4	5	2	2	3	4	3	4	5	5	4	1	5	5	4	4	5	4	5	4	4	4	4	5	4	5	5	5	4.16667	4.4	4.75	4	3.5
196	1	6	2	5	4	2	5	5	5	4	5	4	5	4	5	5	4	5	4	4	4	5	5	5	5	4	5	4	5	4	4.66667	4.2	4.5	5	4.75
197	2	2	4	5	2	1	4	3	3	3	3	3	3	4	4	3	3	4	3	3	3	4	3	4	4	3	3	4	4	3	3.33333	3.2	3.5	3.75	3.25
198	1	6	1	3	5	2	3	4	4	4	4	4	4	5	4	5	5	4	4	5	5	3	5	4	3	4	4	5	4	4	4.33333	4.6	4.25	3.75	3.75
199	1	3	4	5	4	1	3	4	4	4	4	4	5	4	4	4	3	3	4	3	3	4	4	4	3	4	5	4	4	4	4.16667	3.2	4.25	3.75	3.75
200	2	3	3	4	2	2	3	3	4	4	4	4	3	3	4	4	2	2	2	4	2	2	2	1	2	4	3	3	4	4	3.66667	2.4	3.5	1.75	3.5
201	2	3	4	5	4	1	4	5	5	4	5	5	4	5	5	5	5	5	5	5	5	5	5	4	4	5	4	5	5	5	4.83333	5	4.75	4.5	4.5
202	1	6	1	3	5	2	4	5	5	5	1	5	4	5	4	5	5	5	5	5	5	5	5	4	5	5	4	5	4	5	4	5	4.5	4.75	4.75
203	1	6	2	3	2	3	5	4	4	5	4	5	5	5	4	4	4	4	5	5	4	4	4	4	5	5	5	5	4	5	4.5	4.4	4.75	4.25	4.5
204	2	5	1	3	5	2	5	4	5	5	5	4	5	4	5	4	5	4	5	4	4	5	5	5	4	4	5	4	5	5	4.5	4.4	4.5	4.75	4.75
205	2	5	2	5	2	3	5	5	5	5	5	4	5	5	5	5	4	4	5	5	4	4	5	5	5	4	5	5	5	5	4.83333	4.4	4.75	4.75	5
206	2	5	1	2	5	2	5	5	5	5	5	5	5	5	4	5	5	5	3	5	4	3	3	5	5	5	5	5	4	5	4.83333	4.4	4.75	4	5
207	2	6	1	4	4	2	4	5	5	4	1	5	5	4	5	5	4	5	5	3	4	3	3	3	5	5	5	4	5	5	4.16667	4.2	4.75	3.5	4.5
208	2	4	3	2	2	3	3	4	3	4	3	4	4	4	4	3	4	3	4	4	3	2	3	2	3	4	4	4	4	4	3.66667	3.6	4	2.5	3.5
209	2	6	1	3	5	2	5	5	5	5	5	4	5	5	4	5	5	5	5	5	5	5	5	5	5	4	5	5	4	5	4.66667	5	4.5	5	5
210	1	4	1	2	5	2	5	4	4	4	5	5	5	4	5	5	4	4	5	5	5	4	4	5	5	5	5	4	5	5	4.83333	4.6	4.75	4.5	4.25
211	1	5	1	2	3	2	5	5	5	5	5	5	4	5	5	5	5	4	5	4	5	5	4	5	5	5	4	5	5	5	4.83333	4.6	4.75	4.75	5
212	2	4	1	2	4	2	4	4	4	4	5	4	5	5	4	5	4	4	4	4	5	5	5	5	5	4	5	5	4	5	4.66667	4.2	4.5	5	4
213	1	2	1	2	6	1	5	5	5	4	5	5	4	5	5	5	5	5	5	5	5	4	5	5	5	5	4	5	5	5	4.83333	5	4.75	4.75	4.75
214	2	2	3	4	2	1	5	4	5	5	5	4	5	5	5	4	5	5	4	5	5	3	3	2	2	4	5	5	5	5	4.66667	4.8	4.75	2.5	4.75
215	2	3	3	3	6	2	5	5	5	4	4	4	5	5	5	5	3	2	3	2	2	4	4	3	4	4	5	5	5	5	4.66667	2.4	4.75	3.75	4.75
216	2	6	1	2	5	2	4	4	4	5	4	5	5	5	5	5	4	4	4	4	3	2	3	2	3	5	5	5	5	5	4.83333	3.8	5	2.5	4.25
217	2	6	1	2	4	2	3	4	3	4	4	4	4	3	4	4	3	5	5	3	3	5	5	5	5	4	4	3	4	4	3.83333	3.8	3.75	5	3.5
218	1	6	1	2	5	2	3	2	2	2	2	2	2	3	2	2	1	1	1	2	2	4	4	3	2	2	2	3	2	2	2.16667	1.4	2.25	3.25	2.25
219	1	6	1	2	5	2	4	4	4	3	4	4	4	3	4	4	2	3	4	4	3	2	2	2	2	4	4	3	4	4	3.83333	3.2	3.75	2	3.75
220	1	2	2	1	1	2	3	4	4	4	3	4	4	4	4	3	4	4	3	4	3	4	3	2	3	4	4	4	4	4	3.66667	3.6	4	3	3.75
221	1	2	3	2	2	2	4	4	4	4	4	3	1	4	4	3	5	5	5	4	5	4	2	2	4	3	4	4	4	4	3.16667	4.8	3.75	3	4
222	1	6	1	1	5	2	5	5	4	5	5	5	5	3	4	4	5	5	4	5	5	4	5	3	5	5	5	3	4	5	4.33333	4.8	4.25	4.25	4.75
223	2	6	1	5	4	2	5	5	4	5	5	4	4	5	4	4	5	4	5	4	4	4	4	2	2	4	4	5	4	5	4.33333	4.4	4.25	3	4.75
224	1	6	1	2	5	2	5	5	5	5	5	4	5	5	5	5	5	5	5	5	5	5	5	5	5	4	5	5	5	5	4.83333	5	4.75	5	5
225	2	3	3	2	3	1	2	2	5	5	5	5	5	4	5	5	5	5	5	5	4	2	2	2	4	5	5	4	5	5	4.83333	4.8	4.75	2.5	3.5
226	1	6	1	2	5	2	4	5	5	5	5	4	5	4	5	5	5	5	5	5	4	3	1	1	2	4	5	4	5	5	4.66667	4.8	4.5	1.75	4.75
227	2	2	3	3	2	1	2	5	5	5	4	5	4	5	5	5	3	4	5	3	3	2	4	3	2	5	4	5	5	5	4.66667	3.6	4.75	2.75	4.25
228	2	6	2	3	6	3	5	4	5	5	4	1	5	5	5	5	5	5	5	5	4	5	5	5	5	4	5	5	5	5	4.16667	4.8	4.75	5	4.75
229	2	6	1	2	6	2	4	5	5	5	5	4	5	5	5	5	3	4	4	4	3	3	2	2	3	4	5	5	5	5	4.83333	3.6	4.75	2.5	4.75
230	1	6	1	4	3	2	5	5	4	5	5	1	4	5	5	5	4	3	4	5	5	3	3	3	3	5	4	5	5	5	4.16667	4.2	4.75	3	4.75
231	2	4	2	4	4	2	4	3	4	4	4	1	4	4	3	4	3	4	4	4	4	2	3	3	2	3	4	4	3	4	3.33333	3.8	3.5	2.5	3.75
232	2	5	1	2	3	1	5	5	5	4	5	11	4	5	5	4	5	5	5	4	4	3	4	4	4	5	4	5	5	5	5.66667	4.6	4.75	3.75	4.75
233	1	5	1	4	4	2	5	5	5	5	4	5	4	5	5	5	5	5	5	5	5	5	5	4	4	5	4	5	5	5	4.66667	5	4.75	4.5	5
234	2	6	1	2	6	2	4	5	5	5	5	5	1	5	4	5	5	5	5	5	5	5	5	4	5	5	5	5	5	5	4.16667	5	5	4.75	4.75
235	2	6	1	1	5	2	5	4	5	5	4	5	5	5	5	4	4	4	5	5	4	4	4	4	5	5	4	4	5	5	4.66667	4.4	4.5	4.25	4.75
236	1	5	1	4	4	2	5	4	5	5	5	1	5	5	5	4	5	4	5	4	4	5	5	5	4	5	5	4	5	5	4.16667	4.4	4.75	4.75	4.75
237	1	3	1	2	3	1	3	2	2	2	2	2	1	2	2	3	2	2	2	2	1	3	3	3	3	3	3	2	3	2	2	1.8	2.75	3	2.25
238	1	6	1	1	5	2	5	5	5	5	5	5	5	5	4	5	5	5	3	5	4	3	3	5	5	5	4	4	5	5	4.83333	4.4	4.5	4	5
239	1	6	2	3	3	2	4	5	5	4	5	5	4	4	4	4	4	5	5	3	4	3	3	3	5	5	5	5	5	5	4.33333	4.2	5	3.5	4.5
240	2	5	1	2	5	2	3	4	4	4	3	4	3	4	4	3	4	3	4	4	3	2	3	2	3	5	5	5	5	4	3.5	3.6	5	2.5	3.75
241	1	6	1	2	3	2	5	5	5	5	1	5	4	5	4	5	5	5	5	5	5	5	5	5	5	5	5	5	5	5	4	5	5	5	5
242	1	2	2	5	6	2	5	4	4	4	5	5	5	5	5	4	4	5	5	5	4	4	4	5	5	5	5	5	5	5	4.83333	4.6	5	4.5	4.25
243	1	4	1	3	3	3	5	5	5	5	1	4	5	5	5	5	5	5	5	5	4	5	4	5	5	3	4	4	4	5	4.16667	4.8	3.75	4.75	5
244	2	4	2	2	6	2	4	4	4	4	5	4	4	5	4	5	5	5	5	5	4	5	5	5	5	4	5	5	5	5	4.5	4.8	4.75	5	4
245	1	6	2	3	6	2	5	5	5	4	5	5	5	5	5	5	5	5	5	5	5	4	5	5	5	5	3	5	4	5	5	5	4.25	4.75	4.75
246	2	4	1	3	4	2	4	3	3	3	3	3	3	3	4	3	3	4	4	4	4	4	3	4	4	5	5	5	5	3	3.16667	3.8	5	3.75	3.25
247	2	4	1	2	6	2	3	3	3	3	3	2	1	3	3	3	2	3	3	4	4	2	2	2	2	4	5	4	5	3	2.5	3.2	4.5	2	3
248	2	3	3	4	2	2	4	5	4	5	4	5	5	5	5	5	4	4	5	5	4	1	3	3	1	3	5	5	5	5	4.83333	4.4	4.5	2	4.5
249	2	5	1	3	5	2	5	4	5	5	3	5	4	5	5	5	5	5	4	3	5	2	3	3	3	4	5	5	5	5	4.5	4.4	4.75	2.75	4.75
250	1	6	1	1	5	2	5	5	5	5	5	5	1	5	5	5	4	4	4	5	4	2	2	1	2	5	4	4	5	5	4.33333	4.2	4.5	1.75	5
251	2	6	3	5	2	3	5	5	5	4	5	4	5	5	4	5	5	4	5	4	5	2	2	3	2	3	5	5	5	5	4.66667	4.6	4.5	2.25	4.75
252	1	3	3	5	2	2	4	3	3	3	3	3	1	3	4	3	4	4	3	3	3	4	3	4	4	5	4	5	5	3	2.83333	3.4	4.75	3.75	3.25
253	2	4	3	5	2	2	5	5	5	5	5	5	4	5	4	5	5	5	5	5	5	5	5	4	5	5	5	4	5	5	4.66667	5	4.75	4.75	5
254	1	5	2	3	5	2	5	4	5	5	4	5	5	1	4	4	4	5	5	5	4	4	4	4	5	5	4	5	5	5	3.83333	4.6	4.75	4.25	4.75
255	2	6	1	2	5	2	5	4	5	5	5	4	5	4	5	4	5	4	5	4	4	5	5	5	4	5	5	4	5	5	4.5	4.4	4.75	4.75	4.75
256	1	2	3	4	1	2	5	5	5	5	5	4	5	5	3	5	5	4	4	4	5	4	5	5	5	4	5	4	4	5	4.5	4.4	4.25	4.75	5
257	1	3	1	4	6	2	5	5	5	5	5	5	5	5	4	5	5	5	3	5	4	3	3	5	5	5	4	4	5	5	4.83333	4.4	4.5	4	5
258	2	4	2	3	6	2	4	5	5	5	5	5	4	4	5	4	4	5	5	3	4	3	3	3	5	5	3	3	5	5	4.5	4.2	4	3.5	4.75
259	2	4	2	4	5	2	3	4	4	4	3	4	3	4	4	3	4	3	4	4	3	2	3	2	3	2	4	3	4	4	3.5	3.6	3.25	2.5	3.75
260	2	5	2	3	5	2	5	5	5	5	5	5	5	1	5	5	5	5	5	5	5	5	5	5	5	5	5	5	5	5	4.33333	5	5	5	5
261	2	4	3	5	4	2	5	4	4	4	5	5	5	5	5	4	4	4	4	5	4	4	4	5	5	5	5	5	5	5	4.83333	4.2	5	4.5	4.25
262	1	4	2	4	4	2	5	5	5	5	5	4	4	1	4	5	5	5	5	5	4	5	4	5	5	5	5	5	5	5	3.83333	4.8	5	4.75	5
263	2	3	3	4	4	2	4	4	4	4	5	4	5	5	4	5	4	4	5	5	4	5	5	5	5	5	5	5	5	5	4.66667	4.4	5	5	4
264	2	6	1	5	5	2	4	5	5	4	5	5	4	11	3	4	4	5	5	3	4	3	3	3	2	3	4	5	4	3	5.33333	4.2	4	2.75	4.5
265	2	3	3	3	4	2	3	4	3	4	3	2	3	2	4	3	2	3	2	2	2	2	4	4	4	4	5	5	5	2	2.83333	2.2	4.75	3.5	3.5
266	1	4	3	3	4	2	5	5	5	5	5	5	5	5	5	5	5	5	5	5	5	5	5	5	5	5	5	5	5	5	5	5	5	5	5
267	1	4	3	3	4	2	2	4	3	3	1	2	2	2	2	1	5	5	4	5	5	2	2	3	2	5	5	5	5	5	1.66667	4.8	5	2.25	3
268	1	3	3	4	4	2	5	5	5	5	5	3	3	1	3	3	5	5	5	5	4	5	3	5	5	5	5	5	5	5	3	4.8	5	4.5	5
269	2	6	1	1	5	2	4	2	2	4	2	1	2	2	2	1	4	2	2	5	2	2	2	2	2	5	5	5	5	2	1.66667	3	5	2	3
270	2	6	1	1	5	1	5	5	5	4	5	5	5	5	5	5	2	3	5	3	3	4	5	5	5	5	5	5	5	3	5	3.2	5	4.75	4.75
271	2	3	2	5	4	2	2	2	2	2	4	4	4	3	2	4	2	2	4	3	3	4	5	4	4	5	5	5	5	3	3.5	2.8	5	4.25	2
272	2	4	2	2	6	2	4	5	5	5	5	5	4	5	4	5	5	5	5	5	5	5	5	4	5	5	5	5	5	5	4.66667	5	5	4.75	4.75
273	2	6	1	1	4	2	5	4	4	5	4	5	5	1	4	4	4	4	5	5	4	4	4	4	5	5	5	5	5	5	3.83333	4.4	5	4.25	4.5
274	1	5	1	3	5	1	5	4	3	5	5	4	5	4	5	4	5	4	5	4	4	5	5	5	4	5	5	5	5	5	4.5	4.4	5	4.75	4.25
275	1	1	3	2	1	2	5	5	5	5	5	4	5	5	5	5	3	3	2	3	2	4	5	5	5	5	5	5	5	5	4.83333	2.6	5	4.75	5
276	1	5	1	1	5	1	5	5	5	5	5	5	5	5	4	5	5	5	4	5	4	3	3	5	5	5	4	4	5	5	4.83333	4.6	4.5	4	5
277	2	4	1	2	5	2	4	5	5	4	5	5	4	4	4	4	4	5	5	3	4	3	3	3	5	5	3	3	5	5	4.33333	4.2	4	3.5	4.5
278	2	5	1	2	4	2	3	4	3	4	4	4	3	4	4	4	4	3	4	4	3	2	3	2	3	2	4	3	4	4	3.83333	3.6	3.25	2.5	3.5
279	2	4	1	1	5	1	5	5	5	5	5	1	5	4	5	5	5	5	5	5	5	5	5	5	5	5	5	5	5	5	4.16667	5	5	5	5
280	1	4	1	4	1	2	5	4	4	4	5	5	5	5	5	4	4	4	4	5	5	4	4	5	5	5	5	5	5	5	4.83333	4.4	5	4.5	4.25
281	2	3	3	2	6	2	5	5	5	5	5	5	4	5	5	5	5	5	5	5	4	5	4	5	5	5	5	5	5	5	4.83333	4.8	5	4.75	5
282	2	4	3	2	6	2	4	5	5	5	5	4	5	5	4	5	4	4	5	5	4	5	5	5	5	5	5	5	5	5	4.66667	4.4	5	5	4.75
283	2	6	1	2	5	2	5	5	5	4	5	4	5	1	5	5	5	5	5	5	5	4	5	5	5	5	5	5	5	5	4.16667	5	5	4.75	4.75
284	2	4	3	3	5	2	2	2	2	2	2	2	2	1	2	1	2	2	2	3	2	3	3	3	3	3	4	5	4	2	1.66667	2.2	4	3	2
285	1	5	1	2	5	2	5	3	5	5	4	4	1	3	3	4	5	4	5	5	4	3	3	3	3	4	5	5	5	4	3.16667	4.6	4.75	3	4.5
286	2	5	1	4	3	1	4	4	4	4	4	4	4	5	4	4	5	5	5	5	5	4	4	3	2	5	5	5	5	5	4.16667	5	5	3.25	4
287	2	6	1	2	4	2	4	5	5	4	5	5	4	4	3	4	3	3	3	3	3	3	3	3	5	5	5	4	5	5	4.16667	3	4.75	3.5	4.5
288	1	6	1	2	5	2	3	4	3	4	3	2	3	2	4	3	2	3	3	2	2	2	4	4	5	5	4	5	5	5	2.83333	2.4	4.75	3.75	3.5
289	1	6	2	3	4	2	5	5	5	5	5	5	5	5	5	5	5	5	5	5	5	5	5	5	4	5	5	4	5	5	5	5	4.75	4.75	5
290	2	6	3	5	6	3	2	4	3	3	1	2	1	2	2	1	4	5	5	4	4	2	2	3	5	4	5	4	4	5	1.5	4.4	4.25	3	3
291	1	6	2	4	2	3	5	5	5	5	5	3	3	5	3	3	5	5	3	5	4	5	3	5	5	5	4	4	5	5	3.66667	4.4	4.5	4.5	5
292	2	5	1	2	5	2	4	2	2	4	2	1	2	2	2	1	1	1	2	2	2	2	2	2	5	5	3	3	5	5	1.66667	1.6	4	2.75	3
293	2	6	1	1	5	2	5	5	5	4	5	5	5	5	5	5	3	3	2	3	3	4	5	5	3	2	4	3	4	4	5	2.8	3.25	4.25	4.75
294	1	5	3	5	2	2	2	2	2	2	4	4	4	3	2	4	2	2	4	3	3	4	5	4	5	5	5	5	5	5	3.5	2.8	5	4.5	2
295	2	6	1	3	5	2	5	5	5	5	5	5	5	5	5	5	5	5	5	5	5	5	5	5	5	5	5	5	5	5	5	5	5	5	5
296	1	2	1	2	6	3	5	5	4	5	4	4	4	4	5	4	5	5	5	5	5	4	4	5	5	5	5	5	5	5	4.16667	5	5	4.5	4.75
297	2	1	2	2	6	2	5	5	5	5	5	4	4	5	5	5	5	5	4	5	4	5	4	5	5	5	5	5	5	5	4.66667	4.6	5	4.75	5
298	2	4	2	4	2	2	4	4	4	4	5	4	4	5	4	5	4	4	5	5	4	5	5	5	2	3	4	5	4	3	4.5	4.4	4	4.25	4
299	2	3	2	5	4	2	5	5	5	4	5	5	5	5	5	5	5	5	5	5	5	4	5	5	4	4	5	5	5	2	5	5	4.75	4.5	4.75
300	2	2	2	1	6	2	5	5	5	5	5	5	5	5	5	5	5	5	5	5	5	5	5	5	5	5	5	5	5	5	5	5	5	5	5
301	2	4	2	5	4	1	3	2	1	2	2	2	2	1	1	1	2	2	2	3	2	3	3	3	3	5	5	5	5	2	1.5	2.2	5	3	2
302	2	4	3	3	6	2	4	5	5	4	5	5	4	5	5	4	5	5	5	5	5	5	5	4	4	5	5	5	5	5	4.66667	5	5	4.5	4.5
303	2	5	1	1	5	2	4	5	5	5	5	5	4	1	4	5	5	5	5	5	5	5	5	4	5	5	5	5	5	5	4	5	5	4.75	4.75
304	2	2	3	2	6	2	5	5	5	5	4	5	5	5	4	4	4	4	5	5	4	4	4	4	5	5	5	5	5	5	4.5	4.4	5	4.25	5
305	2	2	3	2	6	2	5	5	3	5	5	4	5	4	5	4	5	4	5	4	4	5	5	5	4	5	5	5	5	5	4.5	4.4	5	4.75	4.5
306	1	6	1	3	6	2	5	5	5	5	5	4	5	5	5	5	5	5	5	4	4	4	5	5	5	5	5	5	5	5	4.83333	4.6	5	4.75	5
307	1	6	1	1	5	2	5	5	5	5	5	5	5	5	4	5	5	5	4	5	4	3	3	5	5	5	5	5	5	5	4.83333	4.6	5	4	5
308	2	6	1	2	6	2	4	5	5	4	5	5	4	1	5	4	4	5	5	3	4	3	3	3	5	5	5	4	5	5	4	4.2	4.75	3.5	4.5
309	2	6	1	1	5	2	3	4	3	4	3	4	3	4	4	3	4	3	4	4	3	2	3	2	5	5	4	5	5	5	3.5	3.6	4.75	3	3.5
310	1	6	1	1	3	2	5	5	5	5	5	5	4	5	5	5	5	5	5	5	5	5	5	5	4	5	5	4	5	5	4.83333	5	4.75	4.75	5
311	1	6	1	5	6	2	4	5	5	4	5	5	4	4	3	4	4	3	3	3	4	3	3	3	5	4	5	4	4	5	4.16667	3.4	4.25	3.5	4.5
312	2	6	1	1	5	2	3	4	3	4	3	2	3	2	4	3	1	1	2	2	2	2	4	4	5	5	4	4	5	5	2.83333	1.6	4.5	3.75	3.5
313	1	5	3	4	6	3	5	5	5	5	5	5	5	5	5	5	5	5	5	5	5	5	5	5	5	5	3	3	5	5	5	5	4	5	5
314	1	6	1	2	5	2	2	4	3	3	1	2	2	2	2	1	4	4	4	3	3	2	2	3	3	2	4	3	4	4	1.66667	3.6	3.25	2.5	3
315	1	4	1	5	3	2	5	5	5	5	5	3	3	5	3	3	5	5	3	5	4	5	3	5	5	5	5	5	5	5	3.66667	4.4	5	4.5	5
316	1	6	1	1	5	2	4	2	2	1	2	1	2	2	2	1	4	4	5	5	4	2	2	2	5	5	5	5	5	5	1.66667	4.4	5	2.75	2.25
317	1	6	2	3	3	2	5	5	5	4	5	5	5	5	5	5	5	5	5	5	5	4	5	5	5	5	5	5	5	5	5	5	5	4.75	4.75
318	2	3	2	3	4	2	2	2	2	2	4	4	4	3	2	4	2	2	4	3	4	4	5	4	5	5	5	5	5	5	3.5	3	5	4.5	2
319	2	4	1	2	6	2	4	5	5	5	5	5	4	4	5	5	4	2	4	2	4	3	4	3	2	3	4	5	4	3	4.66667	3.2	4	3	4.75
320	2	2	2	2	5	1	5	3	5	5	2	5	5	5	5	5	2	2	2	2	2	4	3	3	4	4	5	5	5	2	4.5	2	4.75	3.5	4.5
321	2	3	2	3	4	3	3	4	3	4	1	4	3	4	1	3	4	3	4	4	3	2	3	2	3	4	4	3	4	4	2.66667	3.6	3.25	2.5	3.5
322	2	2	2	3	2	2	4	4	4	4	4	4	3	4	4	4	2	1	1	3	2	2	2	2	3	2	2	2	4	4	3.83333	1.8	2.5	2.25	4
323	2	5	3	3	3	2	4	4	3	4	4	3	4	4	4	4	3	2	3	2	2	2	2	2	2	4	4	4	4	4	3.83333	2.4	4	2	3.75
324	2	4	2	2	3	2	4	5	5	5	4	5	4	5	5	4	5	5	5	5	5	5	5	4	4	3	4	5	4	5	4.5	5	4	4.5	4.75
325	2	3	3	2	3	3	4	5	5	5	5	1	4	5	4	5	5	5	5	5	5	5	5	4	5	4	5	5	5	5	4	5	4.75	4.75	4.75
326	2	3	2	4	4	2	3	2	2	2	1	2	2	3	1	2	2	2	2	3	4	3	3	3	3	3	3	2	3	2	1.83333	2.6	2.75	3	2.25
327	1	6	1	3	5	2	5	4	4	5	5	4	1	4	5	4	5	4	5	4	4	5	5	5	4	5	5	4	5	5	3.83333	4.4	4.75	4.75	4.5
328	2	3	1	1	5	2	5	5	5	1	3	4	5	5	5	5	3	3	4	3	2	4	5	5	5	4	5	5	4	5	4.5	2.6	4.5	4.75	4
329	2	5	1	2	3	2	5	5	5	5	5	5	5	5	4	5	5	5	3	5	4	3	3	5	5	5	4	4	5	5	4.83333	4.4	4.5	4	5
330	2	2	3	5	2	2	4	5	5	4	5	5	4	4	5	4	4	5	5	3	4	3	3	3	5	5	3	3	5	5	4.5	4.2	4	3.5	4.5
331	1	4	1	4	4	2	3	4	4	4	3	4	4	4	4	3	4	3	4	4	3	2	3	2	3	2	4	3	4	4	3.66667	3.6	3.25	2.5	3.75
332	2	4	1	3	4	2	4	5	5	1	5	5	4	4	3	4	4	5	5	3	4	3	3	3	2	5	3	3	5	3	4.16667	4.2	4	2.75	3.75
333	1	6	3	5	6	2	3	4	3	4	1	2	3	2	4	3	4	3	4	4	3	2	4	4	4	2	4	3	4	2	2.5	3.6	3.25	3.5	3.5
334	2	6	3	5	6	2	5	5	5	5	5	5	5	5	5	5	5	5	5	5	5	5	5	5	5	5	5	5	5	5	5	5	5	5	5
335	2	2	3	5	2	2	2	4	3	3	1	2	2	2	2	1	4	4	4	3	3	2	2	3	2	3	5	4	4	5	1.66667	3.6	4	2.25	3
336	2	5	2	2	3	2	5	5	5	5	5	3	3	5	3	3	5	5	3	5	4	5	3	5	5	5	5	5	4	5	3.66667	4.4	4.75	4.5	5
337	1	5	1	3	4	2	4	2	2	4	2	1	2	2	2	1	4	4	5	5	4	2	2	2	2	3	4	2	2	2	1.66667	4.4	2.75	2	3
338	2	6	1	3	3	1	5	5	5	4	5	5	5	5	5	5	5	5	5	5	5	4	5	5	5	3	3	3	5	3	5	5	3.5	4.75	4.75
339	1	6	1	1	5	2	2	2	2	2	4	4	4	3	2	4	2	2	4	3	4	4	5	4	4	3	2	4	4	3	3.5	3	3.25	4.25	2
340	1	4	1	3	3	2	5	4	5	5	5	4	4	5	5	5	3	3	4	3	5	3	4	5	3	5	4	4	5	5	4.66667	3.6	4.5	3.75	4.75
341	1	2	3	3	2	2	4	4	4	3	4	3	3	4	4	3	2	3	3	2	2	4	2	4	2	2	2	3	2	4	3.5	2.4	2.25	3	3.75
342	2	5	1	2	5	2	4	5	5	4	4	5	4	5	5	4	5	5	5	5	5	5	5	4	4	3	4	5	4	5	4.5	5	4	4.5	4.5
343	2	5	2	3	4	2	4	5	5	5	5	5	4	5	4	5	5	5	5	5	5	5	5	4	5	4	5	5	5	5	4.66667	5	4.75	4.75	4.75
344	1	6	1	1	5	1	5	4	4	5	4	5	5	5	4	4	4	4	5	5	4	4	4	4	5	5	4	4	5	5	4.5	4.4	4.5	4.25	4.5
345	1	4	1	3	3	2	5	4	4	1	5	4	5	4	5	4	5	4	5	4	4	5	5	5	4	5	5	4	5	5	4.5	4.4	4.75	4.75	3.5
346	1	4	2	2	5	2	5	5	5	5	5	4	5	5	5	5	3	3	2	3	2	4	5	5	5	4	5	5	4	5	4.83333	2.6	4.5	4.75	5
347	1	4	3	4	4	2	5	5	5	5	2	5	5	5	4	5	5	5	3	5	4	3	3	5	5	5	4	4	5	5	4.33333	4.4	4.5	4	5
348	1	6	2	3	5	2	4	5	5	5	5	5	4	4	3	4	4	5	5	3	4	3	3	3	5	5	3	3	5	5	4.16667	4.2	4	3.5	4.75
349	2	6	1	1	5	2	3	4	4	4	3	4	3	4	4	3	4	3	2	4	3	2	3	2	3	2	4	3	4	4	3.5	3.2	3.25	2.5	3.75
350	2	5	3	3	2	2	5	5	5	2	2	5	5	5	5	5	5	5	5	5	5	5	5	5	5	5	5	5	5	5	4.5	5	5	5	4.25
351	1	6	3	3	3	2	5	4	5	5	4	4	4	4	5	4	4	4	4	3	3	4	4	5	5	3	5	4	4	5	4.16667	3.6	4	4.5	4.75
352	2	4	3	4	4	2	5	5	5	5	5	4	4	5	5	5	5	5	3	5	4	5	4	5	5	5	5	5	4	5	4.66667	4.4	4.75	4.75	5
353	2	6	3	4	5	2	4	5	5	5	5	4	4	5	4	5	4	4	5	5	4	5	5	5	5	5	4	4	3	5	4.5	4.4	4	5	4.75
354	2	4	2	3	2	2	5	5	5	4	5	5	5	5	5	5	5	5	5	5	5	4	5	5	5	3	3	3	5	5	5	5	3.5	4.75	4.75
355	2	6	1	2	5	2	3	3	3	2	3	2	3	2	3	3	2	2	3	2	2	4	4	4	3	2	2	2	2	3	2.66667	2.2	2	3.75	2.75
356	2	4	3	4	4	2	4	5	5	4	4	5	4	5	5	4	5	5	5	5	5	5	5	4	4	3	4	5	4	5	4.5	5	4	4.5	4.5
357	2	4	3	2	2	2	4	5	5	5	5	5	4	5	4	5	5	2	5	5	5	5	5	4	5	4	5	5	5	5	4.66667	4.4	4.75	4.75	4.75
358	2	2	3	3	1	1	5	4	4	2	4	5	5	5	4	4	4	4	5	5	4	4	4	4	5	5	4	4	5	5	4.5	4.4	4.5	4.25	3.75
359	1	6	1	1	5	2	5	4	5	5	2	4	5	4	5	4	5	4	2	4	4	5	5	5	4	5	5	4	5	5	4	3.8	4.75	4.75	4.75
360	2	3	3	3	2	2	5	5	5	5	5	4	5	5	5	5	3	3	2	3	2	4	5	5	5	4	5	5	4	5	4.83333	2.6	4.5	4.75	5
361	2	2	3	5	1	2	5	5	5	5	5	5	5	5	4	5	5	5	3	5	4	3	3	5	5	5	4	4	5	5	4.83333	4.4	4.5	4	5
362	2	2	3	3	2	2	4	5	5	4	5	5	4	4	5	4	4	5	5	3	4	3	3	3	5	5	3	3	5	5	4.5	4.2	4	3.5	4.5
363	2	5	2	3	6	2	3	4	4	4	3	4	3	4	4	3	4	3	4	4	3	2	3	2	3	2	4	3	4	4	3.5	3.6	3.25	2.5	3.75
364	1	6	1	2	5	2	5	5	5	5	5	5	5	5	5	5	5	5	5	5	5	5	5	5	5	5	5	5	5	5	5	5	5	5	5
365	1	5	1	3	3	3	5	4	4	4	4	4	4	4	5	4	4	4	4	3	3	4	4	5	5	3	5	4	4	5	4.16667	3.6	4	4.5	4.25
366	1	4	2	4	4	2	5	5	5	5	5	4	4	5	5	5	5	5	2	5	4	5	4	5	5	5	5	5	4	5	4.66667	4.2	4.75	4.75	5
367	2	3	1	2	4	3	4	4	4	4	5	4	4	5	4	5	4	4	5	5	4	5	5	5	5	5	4	4	3	5	4.5	4.4	4	5	4
368	1	5	1	1	5	3	5	5	5	4	5	5	5	5	5	5	5	5	5	5	5	4	5	5	5	3	3	3	5	5	5	5	3.5	4.75	4.75
369	1	6	1	1	5	3	3	4	4	4	4	4	4	4	4	3	4	4	2	4	5	4	4	5	4	5	4	4	5	4	3.83333	3.8	4.5	4.25	3.75
370	1	2	3	3	2	3	4	4	4	4	3	4	3	4	4	3	4	3	4	4	3	2	3	2	3	2	4	3	4	4	3.5	3.6	3.25	2.5	4
371	1	5	1	2	3	3	4	5	5	4	4	4	4	5	5	4	5	5	5	5	5	5	5	4	4	3	4	5	4	5	4.33333	5	4	4.5	4.5
372	1	6	1	1	5	2	4	5	5	5	5	5	4	5	4	5	5	5	5	5	5	5	5	4	5	4	5	5	5	5	4.66667	5	4.75	4.75	4.75
373	1	6	1	1	5	3	5	4	4	5	4	5	5	5	4	4	4	4	5	5	4	4	4	4	5	5	4	4	5	5	4.5	4.4	4.5	4.25	4.5
374	1	6	1	1	5	2	5	4	5	5	5	4	5	4	5	4	5	4	5	4	4	5	5	5	4	5	5	4	5	5	4.5	4.4	4.75	4.75	4.75
375	2	6	1	1	5	2	5	5	5	5	5	4	5	5	5	5	3	3	2	3	2	4	5	5	5	4	5	5	4	5	4.83333	2.6	4.5	4.75	5
376	2	3	3	5	4	2	5	5	5	5	5	5	5	5	4	5	5	5	3	5	4	3	3	5	5	5	4	4	5	5	4.83333	4.4	4.5	4	5
377	1	6	2	2	4	2	4	5	5	4	5	5	4	4	5	4	4	5	5	3	4	3	3	3	5	5	3	3	5	5	4.5	4.2	4	3.5	4.5
378	1	6	1	1	5	2	4	4	3	4	3	4	3	4	4	3	4	3	4	2	3	2	3	2	3	2	4	3	4	4	3.5	3.2	3.25	2.5	3.75
379	1	6	1	1	5	2	5	5	5	5	5	5	5	5	5	5	5	5	5	5	5	5	5	5	5	5	5	5	5	5	5	5	5	5	5
380	1	6	1	1	5	2	5	4	4	4	4	5	5	5	5	4	4	4	4	3	3	4	4	5	5	3	5	4	4	5	4.66667	3.6	4	4.5	4.25
381	2	2	3	2	6	2	5	5	5	5	5	4	4	5	5	5	5	5	3	5	4	5	4	5	5	5	5	5	4	5	4.66667	4.4	4.75	4.75	5
382	2	6	1	1	5	3	4	4	4	4	5	4	4	5	4	5	4	4	5	2	4	5	5	5	5	5	4	4	3	5	4.5	3.8	4	5	4
383	2	6	1	1	5	2	5	5	5	4	5	5	4	4	5	5	5	5	5	5	5	4	5	5	5	3	3	3	5	5	4.66667	5	3.5	4.75	4.75
384	1	6	2	2	5	3	4	4	4	4	3	4	3	4	4	4	3	3	4	3	2	4	5	5	5	4	3	4	3	4	3.66667	3	3.5	4.75	4
385	1	6	2	2	5	3	2	2	2	2	2	2	2	1	1	2	2	2	2	3	4	3	3	3	3	3	3	2	3	2	1.66667	2.6	2.75	3	2
386	1	6	1	2	5	3	4	5	5	4	5	5	4	5	5	4	5	5	5	5	5	5	5	4	4	3	4	5	4	5	4.66667	5	4	4.5	4.5
387	2	2	3	2	4	2	4	5	5	5	5	5	4	5	4	5	5	5	5	5	5	5	5	4	5	4	5	5	5	5	4.66667	5	4.75	4.75	4.75
388	2	6	1	3	5	3	5	4	4	5	4	5	5	5	4	4	4	4	5	5	4	4	4	4	5	5	4	4	5	5	4.5	4.4	4.5	4.25	4.5
389	2	6	1	3	5	3	4	4	4	4	4	4	3	4	4	3	4	3	4	4	3	2	3	2	3	2	4	3	4	4	3.66667	3.6	3.25	2.5	4
390	1	6	1	2	5	3	5	5	5	5	5	4	5	5	5	5	3	3	2	3	2	4	5	5	5	4	5	5	4	5	4.83333	2.6	4.5	4.75	5
391	1	2	3	1	1	2	5	5	5	5	5	5	5	5	4	5	5	5	3	5	4	3	3	5	5	5	4	4	5	5	4.83333	4.4	4.5	4	5
392	2	6	1	2	5	3	4	5	5	4	5	5	4	4	5	4	4	5	5	3	4	3	3	3	5	5	3	3	5	5	4.5	4.2	4	3.5	4.5
393	1	6	1	2	5	3	4	4	4	4	4	4	4	4	4	3	4	3	4	4	3	2	3	2	5	5	5	5	4	4	3.83333	3.6	4.75	3	4
394	2	5	1	2	5	2	5	5	5	5	5	5	5	5	5	5	5	5	5	5	5	5	5	5	5	5	4	4	3	5	5	5	4	5	5
395	2	2	3	3	6	2	5	4	5	5	4	4	5	4	5	4	4	4	4	3	3	4	4	5	5	3	3	3	5	5	4.33333	3.6	3.5	4.5	4.75
396	2	3	3	3	2	2	5	5	5	5	5	4	5	5	4	4	5	5	3	2	4	5	4	5	3	2	2	2	2	5	4.5	3.8	2	4.25	5
397	2	3	3	4	2	2	4	4	4	4	5	5	5	5	4	5	4	4	5	5	4	5	5	5	4	3	4	5	4	5	4.83333	4.4	4	4.75	4
398	1	6	1	3	5	2	5	5	5	4	5	5	5	5	5	5	5	5	5	5	5	4	5	5	5	4	5	5	5	5	5	5	4.75	4.75	4.75
399	2	6	1	4	5	2	5	5	5	4	5	4	5	5	5	5	4	4	4	2	3	4	3	3	5	5	4	4	5	5	4.83333	3.4	4.5	3.75	4.75
400	1	6	3	5	6	3	4	4	4	4	3	4	3	4	4	4	4	3	4	4	3	2	3	2	4	5	5	4	5	4	3.66667	3.6	4.75	2.75	4
401	1	5	2	3	2	3	4	5	5	5	5	5	4	5	4	5	5	5	5	5	5	5	5	4	5	4	5	5	4	5	4.66667	5	4.5	4.75	4.75
402	2	3	2	3	2	3	5	4	5	5	4	5	5	5	4	4	4	4	5	5	4	4	4	4	5	5	4	4	5	5	4.5	4.4	4.5	4.25	4.75
403	2	4	3	3	2	2	5	5	5	5	5	4	5	4	5	4	5	4	5	4	4	5	5	5	5	5	3	3	5	5	4.5	4.4	4	5	5
404	2	5	3	3	4	2	5	5	5	5	5	4	5	5	5	5	3	2	2	3	2	4	5	5	3	2	4	3	4	5	4.83333	2.4	3.25	4.25	5
405	2	3	1	2	2	1	5	5	5	5	5	5	5	4	4	5	5	5	3	5	4	3	3	5	5	5	5	5	5	5	4.66667	4.4	5	4	5
406	1	5	3	3	4	3	4	5	5	4	5	5	4	4	5	4	4	5	5	3	4	3	3	3	5	3	5	4	4	5	4.5	4.2	4	3.5	4.5
407	1	5	3	3	3	3	4	4	4	4	3	4	3	4	4	3	4	3	4	4	3	2	3	2	5	5	5	5	4	4	3.5	3.6	4.75	3	4
408	2	4	1	2	3	3	5	5	5	5	5	5	5	5	5	5	5	2	5	5	5	5	5	5	5	5	4	4	3	5	5	4.4	4	5	5
409	1	5	2	3	2	3	5	4	4	4	4	4	4	4	5	5	4	4	4	3	3	4	4	5	5	3	5	4	4	5	4.33333	3.6	4	4.5	4.25
410	2	3	1	3	3	3	5	5	5	5	5	4	4	5	5	4	5	5	3	5	4	5	4	5	5	5	5	5	4	5	4.5	4.4	4.75	4.75	5
411	1	5	3	3	3	2	4	4	3	4	3	4	4	4	4	3	4	3	4	4	3	2	3	2	5	5	5	5	4	4	3.66667	3.6	4.75	3	3.75
412	1	5	3	3	5	2	5	5	5	4	5	5	5	5	5	5	5	5	5	5	5	4	5	5	5	5	4	4	3	5	5	5	4	4.75	4.75
413	2	4	2	2	4	2	4	4	3	4	4	4	4	3	4	3	2	4	4	2	3	4	3	4	5	3	3	3	5	4	3.66667	3	3.5	4	3.75
414	2	2	3	3	3	2	2	2	2	1	2	2	2	2	3	3	2	2	2	3	4	3	3	3	3	2	2	2	2	2	2.33333	2.6	2	3	1.75
415	2	5	1	2	6	2	5	5	5	5	4	4	3	4	4	4	3	3	2	2	2	3	3	3	4	3	4	5	4	4	3.83333	2.4	4	3.25	5
416	2	5	1	1	5	2	3	3	3	3	3	3	3	3	4	3	3	4	4	4	4	4	3	4	5	4	5	5	5	3	3.16667	3.8	4.75	4	3
417	2	4	1	1	5	2	4	3	4	4	3	4	3	3	4	4	4	3	4	4	4	2	2	2	5	5	4	4	5	4	3.5	3.8	4.5	2.75	3.75
418	2	1	2	3	1	1	4	3	4	4	4	4	4	4	3	4	3	4	3	4	3	4	4	4	4	5	5	4	5	4	3.83333	3.4	4.75	4	3.75
419	1	4	1	3	5	2	4	4	4	3	3	4	4	4	4	4	2	2	2	3	3	3	2	2	5	4	5	5	4	4	3.83333	2.4	4.5	3	3.75
420	2	4	1	1	5	2	4	5	5	5	5	5	5	4	5	5	5	4	4	4	3	2	4	2	5	5	4	4	5	5	4.83333	4	4.5	3.25	4.75
421	1	6	2	4	6	2	5	4	5	4	4	4	5	5	5	5	2	4	3	4	4	2	2	1	5	5	3	3	5	5	4.66667	3.4	4	2.5	4.5
422	1	6	1	1	5	2	4	3	3	3	3	3	3	3	4	3	3	4	4	4	4	4	3	4	3	2	4	3	4	3	3.16667	3.8	3.25	3.5	3.25
423	1	6	2	4	6	2	4	5	5	5	5	5	4	5	4	5	5	5	5	5	5	5	5	4	5	5	5	5	5	5	4.66667	5	5	4.75	4.75
424	2	3	3	3	2	2	5	4	4	5	4	5	5	5	4	4	4	4	5	5	4	4	4	4	5	3	5	4	4	5	4.5	4.4	4	4.25	4.5
425	1	4	2	3	5	2	5	4	5	5	5	4	5	4	5	4	5	4	5	4	4	5	5	5	5	5	5	5	4	5	4.5	4.4	4.75	5	4.75
426	2	3	2	5	5	2	5	5	5	5	5	4	5	5	5	5	3	3	2	3	2	4	5	5	5	5	4	4	3	5	4.83333	2.6	4	4.75	5
427	2	3	1	5	5	2	5	5	5	5	5	5	5	5	4	5	5	5	3	5	4	3	3	5	5	5	4	4	5	5	4.83333	4.4	4.5	4	5
428	2	3	3	4	3	2	4	5	5	4	5	5	4	4	5	4	4	5	5	3	4	3	3	3	5	5	3	3	5	5	4.5	4.2	4	3.5	4.5
429	2	2	3	5	2	2	4	4	4	4	3	4	3	4	4	3	4	3	4	4	3	2	3	2	5	5	5	5	4	4	3.5	3.6	4.75	3	4
430	2	3	2	3	4	3	5	5	5	5	5	5	5	5	5	5	5	5	5	5	5	5	5	5	5	5	4	4	3	5	5	5	4	5	5
431	2	2	3	3	6	2	5	4	4	4	5	5	5	4	5	4	4	4	4	3	3	4	4	5	5	3	3	3	5	5	4.66667	3.6	3.5	4.5	4.25
432	2	4	3	5	4	2	4	4	4	4	3	4	3	4	4	3	4	3	4	4	3	2	3	2	3	2	2	2	2	4	3.5	3.6	2	2.5	4
433	1	5	3	5	5	2	4	4	4	4	5	4	5	5	4	5	4	4	2	5	4	5	5	5	4	3	4	5	4	5	4.66667	3.8	4	4.75	4
